# Supplementary material
Source: PubMed Central journal article supplement (PMC2781563)
Supplement: supp_M109.030718_JBC_sup_fig_1.pdf [file supp_M109.030718_JBC_sup_fig_1.pdf]

Supplemental Figure 1.

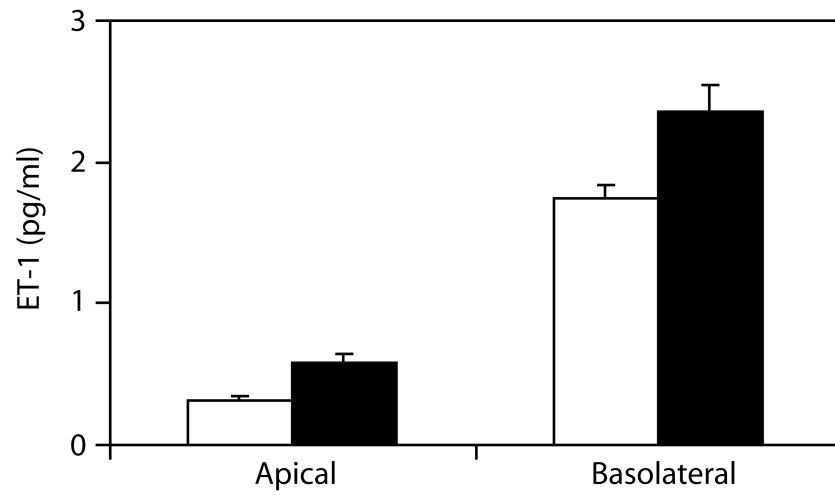

SUPPLEMENTAL FIGURE 1. **Aldosterone stimulated ET-1 peptide release from mIMCD-3 cells.** Confluent monolayers of mIMCD-3 cells grown on permeable supports were treated with vehicle (open bars) or 1 μM aldosterone (closed bars) for 1 h. Media was collected from the top (apical) and bottom (basolateral) wells and soluble ET-1 peptide was measured by ELISA. (n=3)
