# Supplementary material
Source: PubMed Central journal article supplement (PMC2781563)
Supplement: supp_M109.030718_JBC_sup_table1_.pdf [file supp_M109.030718_JBC_sup_table1_.pdf]

Supplemental Table 1. Antibodies and Applications

| <b>Antibody</b>         | <b>Source/Epitope</b>                           | <b>Application</b> | <b>Preparation</b> | <b>Supplier</b>                                       |
|-------------------------|-------------------------------------------------|--------------------|--------------------|-------------------------------------------------------|
| anti-MR                 | monoclonal mouse<br>anti-rat (aa 1-18)          | Western/DAPA       | 1:100              | Kind gift of Drs.<br>Elise and Celso<br>Gomez-Sanchez |
|                         |                                                 | ChIP/ CoIP         | 10 $\mu$ l / IP    |                                                       |
| anti-GR                 | rabbit-anti-mouse<br>(N-terminus)               | Western/DAPA       | 1:5000             | Santa Cruz (sc-<br>1004x)                             |
|                         |                                                 | ChIP/ CoIP         | 2.5 $\mu$ l / IP   |                                                       |
| anti-SRC-1              | monoclonal mouse<br>anti-human (aa 477-<br>947) | ChIP               | 1.5 $\mu$ l / IP   | Upstate (05-522)                                      |
| anti-RNA<br>pol II      | monoclonal mouse<br>anti-human (C-<br>terminus) | Western/DAPA       | 1:1000             | Upstate (05-623)                                      |
|                         |                                                 | ChIP               | 1 $\mu$ l / IP     |                                                       |
| anti-H3                 | rabbit anti-human (C-<br>terminus)              | ChIP               | 2.5 $\mu$ l / IP   | Upstate (07-690)                                      |
| anti-mK4-<br>H3         | rabbit anti-human (aa<br>1-8)                   | ChIP               | 5 $\mu$ l / IP     | Upstate (07-030)                                      |
| anti-actin              | goat-anti-human                                 | Western/DAPA/CoIP  | 1:500              | Santa Cruz (sc-<br>1616)                              |
| secondary<br>antibodies | anti-mouse HRP                                  | Western            | 1:5000             | USB (Rodeo<br>Western Kit)                            |
|                         | anti-rabbit HRP                                 | Western            | 1:5000             | USB (Rodeo<br>Western Kit)                            |
|                         | anti-goat HRP                                   | Western            | 1:10000            | Santa Cruz (sc-<br>2768)                              |
