# Supplementary material
Source: PubMed Central journal article supplement (PMC2781563)
Supplement: supp_M109.030718_JBC_sup_table_2.pdf [file supp_M109.030718_JBC_sup_table_2.pdf]

Supplemental Table 2. Renal ET-1 Peptide Content in Wildtype Rats

| Kidney Region | ET-1 (pg/mg protein) |
|---------------|----------------------|
| CTX           | 9.8 ± 0.8            |
| OM            | 12.0 ± 2.4           |
| IM            | 543.8 ± 112.2        |
